# Supplementary material for: The Phytochrome B/Phytochrome C Heterodimer Is Necessary for Phytochrome C-Mediated Responses in Rice Seedlings
Source: PubMed Central journal article supplement (PMC4031084; doi:10.1371/journal.pone.0097264), 2014-05-22
Supplement: pone.0097264.s008.pdf [file pone.0097264.s008.pdf]

(A) Relation between protein amounts and CBB intensities

Expressed PHYB protein (CBB-stained)

| $\mu\text{l}$ | intensity |
|---------------|-----------|
| 2.5           | 126.8     |
| 5             | 326.6     |
| 7.5           | 430.3     |
| 10            | 660.9     |
| 15            | 916.4     |

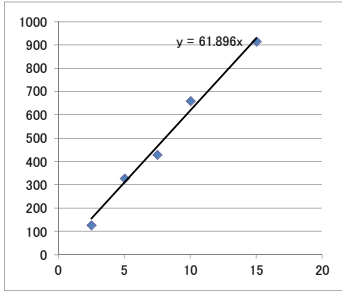

(B) Relation between intensities of CBB- and immuno-staining

PHYB (Immunostain)

| Expressed PHYB (1,000 times diluted) | CBB intensity | immuno-intensity |
|--------------------------------------|---------------|------------------|
| $\mu\text{l}$                        | x             | y                |
| 3.2                                  | 198.08        | 278.7            |
| 6.5                                  | 402.35        | 480.6            |
| 13                                   | 804.7         | 1007.5           |

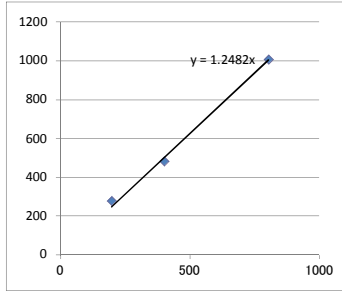

(C) Relation between protein extracts and relative amounts of PHYB or PHYC

| protein ext ( $\mu\text{g}$ ) | immuno-intensity | calculated CBB intensities   |
|-------------------------------|------------------|------------------------------|
| x                             |                  | y                            |
| 6.3                           | 141              | 112.8                        |
| 12.5                          | 265              | 212.0                        |
| 25                            | 517              | 413.6                        |
| (50)                          | (772)            | (617.6) out of the linearity |

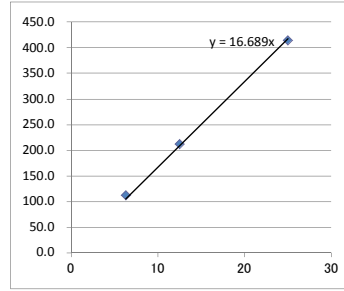

Expressed PHYC protein (CBB-stained)

| $\mu\text{l}$ | intensity |
|---------------|-----------|
| 2.5           | 217.6     |
| 5             | 399.8     |
| 7.5           | 616.1     |
| 10            | 808.9     |
| 15            | 1128.8    |

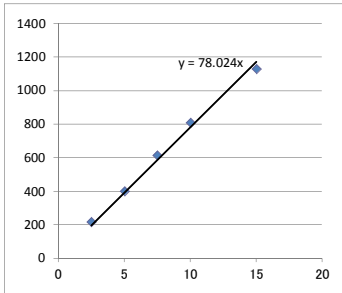

PHYC (Immunostain)

| Expressed PHYC | CBB intensity | immuno-intensity |
|----------------|---------------|------------------|
| $\mu\text{l}$  | x             | y                |
| 3.2            | 249.6         | 235.4            |
| 6.5            | 507           | 452.5            |
| 13             | 1014          | 1036.4           |

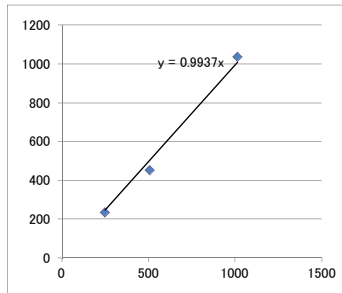

| protein ext ( $\mu\text{g}$ ) | immuno-intensity | calculated CBB intensities   |
|-------------------------------|------------------|------------------------------|
| x                             |                  | y                            |
| 6.3                           | 63.2             | 63.8                         |
| 12.5                          | 178              | 179.8                        |
| 25                            | 324              | 327.3                        |
| (50)                          | (481)            | (485.9) out of the linearity |

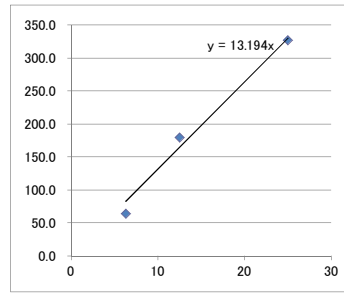

phyB/phyC  
=16.7/13.2  
=1.3
